# Supplementary material for: Estimating ground motion intensities using simulation-based estimates of local crustal seismic response
Source: Copernicus journal article supplement (doi:10.5194/nhess-24-3519-2024), 2024-10-14
Supplement: Supplementary file 2 [file nhess-24-3519-2024-supplement.zip]

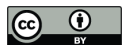

## *Supplement of*

# **Estimating ground motion intensities using simulation-based estimates of local crustal seismic response**

**Himanshu Agrawal and John McCloskey**

*Correspondence to:* Himanshu Agrawal (himansh78@gmail.com, himanshu.agrawal@ed.ac.uk)

- nhess-24-3519-2024-supplement-title-page.pdf
- Supplement
  - ds01.zip
  - movs01.mp4
  - movs02.mp4
  - movs03.mp4
  - movs04.mp4
  - supplementary\_Agrawal\_and\_McCloskey2024.pdf

The copyright of individual parts of the supplement might differ from the article licence.
